# Supplementary material for: Recent trends of “manels”: gender representation among invited panelists at an international oncology conference
Source: PubMed Central journal article supplement (PMC9991598; doi:10.1093/jncics/pkad008), 2023-02-10
Supplement: pkad008_supplementary_data.pdf [file pkad008_supplementary_data.pdf]

**Supplemental Tables**

**Supplementary Table 1. Representation of invited women panelists by role, specialty, session type, and topic**

|                                 | 2018-2021              |                      |                    | 2018                   |                    | 2019                   |                    | 2020                   |                    | 2021                   |                    |                               |
|---------------------------------|------------------------|----------------------|--------------------|------------------------|--------------------|------------------------|--------------------|------------------------|--------------------|------------------------|--------------------|-------------------------------|
| <b>Role</b>                     | <b>Women<br/>n (%)</b> | <b>Men<br/>n (%)</b> | <b>Total<br/>N</b> | <b>Women<br/>n (%)</b> | <b>Total<br/>N</b> | <b>Women<br/>n (%)</b> | <b>Total<br/>N</b> | <b>Women<br/>n (%)</b> | <b>Total<br/>N</b> | <b>Women<br/>n (%)</b> | <b>Total<br/>N</b> | <i>p-value<br/>time trend</i> |
| Panelists*                      | 1181 (47.7)            | 1294 (52.3)          | 2475               | 306 (41.6)             | 736                | 347 (48.1)             | 721                | 245 (49.6)             | 494                | 283 (54.0)             | 524                | <0.001                        |
| Chairs/Moderators**             | 359 (50.6)             | 350 (49.4)           | 709                | 116 (46.8)             | 248                | 123 (52.3)             | 235                | 46 (50.5)              | 91                 | 74 (54.8)              | 135                | 0.157                         |
|                                 |                        |                      |                    |                        |                    |                        |                    |                        |                    |                        |                    |                               |
| <b>Specialty</b>                | 2018-2021              |                      |                    | 2018                   |                    | 2019                   |                    | 2020                   |                    | 2021                   |                    |                               |
|                                 | <b>Women<br/>n (%)</b> | <b>Men<br/>n (%)</b> | <b>Total<br/>N</b> | <b>Women<br/>n (%)</b> | <b>Total<br/>N</b> | <b>Women<br/>n (%)</b> | <b>Total<br/>N</b> | <b>Women<br/>n (%)</b> | <b>Total<br/>N</b> | <b>Women<br/>n (%)</b> | <b>Total<br/>N</b> | <i>p-value<br/>time trend</i> |
| Medical Oncology                | 762 (46.4)             | 880 (53.6)           | 1642               | 224 (42.3)             | 530                | 214 (45.8)             | 467                | 157 (47.7)             | 329                | 167 (52.8)             | 316                | 0.003                         |
| Radiation Oncology              | 62 (45.9)              | 73 (54.1)            | 135                | 14 (31.8)              | 44                 | 15 (45.5)              | 33                 | 9 (47.4)               | 19                 | 24 (61.5)              | 39                 | 0.008                         |
| Surgery/Anesthesiology          | 118 (49.8)             | 119 (50.2)           | 237                | 28 (45.2)              | 62                 | 40 (49.4)              | 81                 | 23 (56.1)              | 41                 | 27 (50.9)              | 53                 | 0.428                         |
| Medicine/Pediatrics             | 58 (48.3)              | 62 (51.7)            | 120                | 6 (46.2)               | 13                 | 17 (41.5)              | 41                 | 13 (43.3)              | 30                 | 22 (61.1)              | 36                 | 0.146                         |
| Pathology/Radiology/Dermatology | 16 (26.2)              | 45 (73.8)            | 61                 | 5 (21.7)               | 23                 | 4 (30.8)               | 13                 | 4 (25.0)               | 16                 | 3 (33.3)               | 9                  | 0.574                         |
| Other                           | 165 (58.9)             | 115 (41.1)           | 280                | 29 (45.3)              | 64                 | 57 (66.3)              | 86                 | 39 (66.1)              | 59                 | 40 (56.3)              | 71                 | 0.307                         |
| <i>p-value</i>                  | <0.001                 |                      |                    | 0.265                  |                    | 0.111                  |                    | 0.034                  |                    | 0.608                  |                    |                               |
|                                 |                        |                      |                    |                        |                    |                        |                    |                        |                    |                        |                    |                               |
| <b>Session Type</b>             | 2018-2021              |                      |                    | 2018                   |                    | 2019                   |                    | 2020                   |                    | 2021                   |                    |                               |
|                                 | <b>Women<br/>n (%)</b> | <b>Men<br/>n (%)</b> | <b>Total<br/>N</b> | <b>Women<br/>n (%)</b> | <b>Total<br/>N</b> | <b>Women<br/>n (%)</b> | <b>Total<br/>N</b> | <b>Women<br/>n (%)</b> | <b>Total<br/>N</b> | <b>Women<br/>n (%)</b> | <b>Total<br/>N</b> | <i>p-value<br/>time trend</i> |
| Scientific                      | 440 (50.9)             | 425 (49.1)           | 865                | 122 (48.8)             | 250                | 127 (51.6)             | 246                | 84 (50.6)              | 166                | 107 (52.7)             | 203                | 0.463                         |
| Leadership/Special              | 47 (43.1)              | 62 (56.9)            | 109                | 8 (28.6)               | 28                 | 7 (26.9)               | 26                 | 13 (48.2)              | 27                 | 19 (67.9)              | 28                 | 0.001                         |
| Educational                     | 694 (46.2)             | 807 (53.8)           | 1501               | 176 (38.4)             | 458                | 213 (47.4)             | 449                | 148 (49.2)             | 301                | 157 (53.6)             | 293                | <0.001                        |
| <i>p-value</i>                  | 0.058                  |                      |                    | 0.010                  |                    | 0.049                  |                    | 0.930                  |                    | 0.327                  |                    |                               |
|                                 |                        |                      |                    |                        |                    |                        |                    |                        |                    |                        |                    |                               |
| <b>Topic</b>                    | 2018-2021              |                      |                    | 2018                   |                    | 2019                   |                    | 2020                   |                    | 2021                   |                    |                               |
|                                 | <b>Women<br/>n (%)</b> | <b>Men<br/>n (%)</b> | <b>Total<br/>N</b> | <b>Women<br/>n (%)</b> | <b>Total<br/>N</b> | <b>Women<br/>n (%)</b> | <b>Total<br/>N</b> | <b>Women<br/>n (%)</b> | <b>Total<br/>N</b> | <b>Women<br/>n (%)</b> | <b>Total<br/>N</b> | <i>p-value<br/>time trend</i> |
| Population sciences             | 247 (50.5)             | 242 (49.5)           | 489                | 47 (40.5)              | 116                | 79 (52.3)              | 151                | 53 (59.6)              | 89                 | 68 (51.1)              | 133                | 0.088                         |
| Breast/Gynecologic cancers      | 158 (58.7)             | 111 (41.3)           | 269                | 48 (57.8)              | 83                 | 43 (53.8)              | 80                 | 33 (62.3)              | 53                 | 34 (64.2)              | 53                 | 0.347                         |
| Genitourinary cancers           | 54 (38.6)              | 86 (61.4)            | 140                | 23 (41.1)              | 56                 | 10 (32.3)              | 31                 | 10 (38.5)              | 26                 | 11 (40.7)              | 27                 | 0.969                         |
| Other cancers                   | 393 (46.2)             | 457 (53.8)           | 850                | 100 (41.0)             | 244                | 100 (45.7)             | 219                | 82 (42.7)              | 192                | 111 (56.9)             | 195                | 0.004                         |
| Supportive oncology             | 83 (70.3)              | 35 (29.7)            | 118                | 31 (64.6)              | 48                 | 24 (82.8)              | 29                 | 14 (73.7)              | 19                 | 14 (63.6)              | 22                 | 0.937                         |
| Translational/Pre-clinical      | 117 (36.7)             | 202 (63.3)           | 319                | 29 (27.4)              | 106                | 38 (39.2)              | 97                 | 27 (44.3)              | 61                 | 23 (41.8)              | 55                 | 0.031                         |
| Other                           | 129 (44.5)             | 161 (55.5)           | 290                | 28 (33.7)              | 83                 | 53 (46.5)              | 114                | 26 (48.1)              | 54                 | 22 (56.4)              | 39                 | 0.016                         |
| <i>p-value</i>                  | <0.001                 |                      |                    | <0.001                 |                    | 0.001                  |                    | 0.009                  |                    | 0.154                  |                    |                               |

\*including chairs

\*\*including co-chairs/co-moderators

*Specialties:*

Surgery: Surgery, Gynecology, Otolaryngology, Neurosurgery, General surgery, Plastic surgery

Medicine: Internal medicine, Family medicine, Pulmonary medicine, Gastroenterology, Cardiology, Endocrinology

Radiology: Radiology, Nuclear medicine

Other: Non-clinical, Immunology, Pharmacology, Palliative Care, Psychiatry, Geriatrics, Other, unknown

*Topics:*

Population sciences: Care delivery & Regulatory policy, Disparities/Health equity, Prevention, Risk reduction, Hereditary cancer, Health services & Quality improvement, Global health, Ethics

Other cancers: Hematologic, Gastrointestinal, Lung, CNS, Head & Neck, Pediatric, Melanoma/Skin, Sarcoma

Translational/Pre-clinical: Developmental Therapeutics, Immunotherapy, Tumor biology, Precision medicine, Cancer genetics

Supportive oncology: Symptoms & Survivorship, Patient & Survivor care, Geriatric

Other: Special sessions, Professional development & Education advances, Clinical trials, Award lecture

**Supplementary Table 2. Manel sessions overall, by session type, and topic**

|                            | 2018-2021 |       | 2018      |       | 2019      |       | 2020      |       | 2021      |       |                   |
|----------------------------|-----------|-------|-----------|-------|-----------|-------|-----------|-------|-----------|-------|-------------------|
|                            | Manels    | Total | Manels    | Total | Manels    | Total | Manels    | Total | Manels    | Total | <i>p-value</i>    |
|                            | n (%)     | N     | n (%)     | N     | n (%)     | N     | n (%)     | N     | n (%)     | N     | <i>time trend</i> |
| <b>Overall</b>             | 81 (12.1) | 670   | 33 (17.4) | 190   | 18 (10.5) | 172   | 15 (9.6)  | 157   | 15 (9.9)  | 151   | 0.030             |
| <b>Session Type</b>        | 2018-2021 |       | 2018      |       | 2019      |       | 2020      |       | 2021      |       |                   |
|                            | Manels    | Total | Manels    | Total | Manels    | Total | Manels    | Total | Manels    | Total | <i>p-value</i>    |
|                            | n (%)     | N     | n (%)     | N     | n (%)     | N     | n (%)     | N     | n (%)     | N     | <i>time trend</i> |
| Scientific                 | 8 (4.2)   | 189   | 1 (2.1)   | 47    | 1 (2.2)   | 46    | 3 (6.3)   | 48    | 3 (6.3)   | 48    | 0.209             |
| Leadership/Special         | 6 (17.1)  | 35    | 2 (25.0)  | 8     | 3 (42.9)  | 7     | 1 (10.0)  | 10    | 0 (0.0)   | 10    | 0.057             |
| Educational                | 67 (15.0) | 446   | 30 (22.2) | 135   | 14 (11.8) | 119   | 11 (11.1) | 99    | 12 (12.9) | 93    | 0.037             |
| <i>p-value</i>             | <0.001    |       | 0.001     |       | 0.007     |       | 0.666     |       | 0.354     |       |                   |
| <b>Topic</b>               | 2018-2021 |       | 2018      |       | 2019      |       | 2020      |       | 2021      |       |                   |
|                            | Manels    | Total | Manels    | Total | Manels    | Total | Manels    | Total | Manels    | Total | <i>p-value</i>    |
|                            | n (%)     | N     | n (%)     | N     | n (%)     | N     | n (%)     | N     | n (%)     | N     | <i>time trend</i> |
| Population sciences        | 15 (10.6) | 141   | 5 (16.1)  | 31    | 4 (10.0)  | 40    | 0 (0.0)   | 29    | 6 (14.6)  | 41    | 0.714             |
| Breast/Gynecologic cancers | 9 (12.0)  | 75    | 3 (13.0)  | 23    | 3 (15.8)  | 19    | 2 (11.8)  | 17    | 1 (6.3)   | 16    | 0.503             |
| Genitourinary cancers      | 5 (13.2)  | 38    | 1 (6.7)   | 15    | 0 (0.0)   | 7     | 3 (33.3)  | 9     | 1 (14.3)  | 7     | 0.219             |
| Other cancers              | 24 (11.0) | 219   | 10 (16.7) | 60    | 5 (10.4)  | 48    | 6 (10.0)  | 60    | 3 (5.9)   | 51    | 0.077             |
| Supportive oncology        | 1 (2.8)   | 36    | 1 (7.1)   | 14    | 0 (0.0)   | 7     | 0 (0.0)   | 7     | 0 (0.0)   | 8     | 0.286             |
| Translational/Pre-clinical | 18 (19.6) | 92    | 9 (30.0)  | 30    | 4 (15.4)  | 26    | 2 (10.5)  | 19    | 3 (17.6)  | 17    | 0.189             |
| Other                      | 9 (13.0)  | 69    | 4 (23.5)  | 17    | 2 (8.0)   | 25    | 2 (12.5)  | 16    | 1 (9.1)   | 11    | 0.333             |
| <i>p-value</i>             | 0.218     |       | 0.465     |       | 0.908     |       | 0.097     |       | 0.588     |       |                   |

Population sciences: Care delivery & Regulatory policy, Disparities/Health equity, Prevention, Risk reduction, Hereditary cancer, Health services & Quality improvement, Global health, Ethics

Other cancers: Hematologic, Gastrointestinal, Lung, CNS, Head & Neck, Pediatric, Melanoma/Skin, Sarcoma

Translational/Pre-clinical: Developmental Therapeutics, Immunotherapy, Tumor biology, Precision medicine, Cancer genetics

Supportive oncology: Symptoms & Survivorship, Patient & Survivor care, Geriatric

Other: Special sessions, Professional development & Education advances, Clinical trials, Award lecture
